# Supplementary material
Source: Springer Nature journal article supplement (https://www.springermedizin.de/resource/supplementary/12889_2009_1980_MOESM2_ESM.pdf/9486630)

Time in weeks

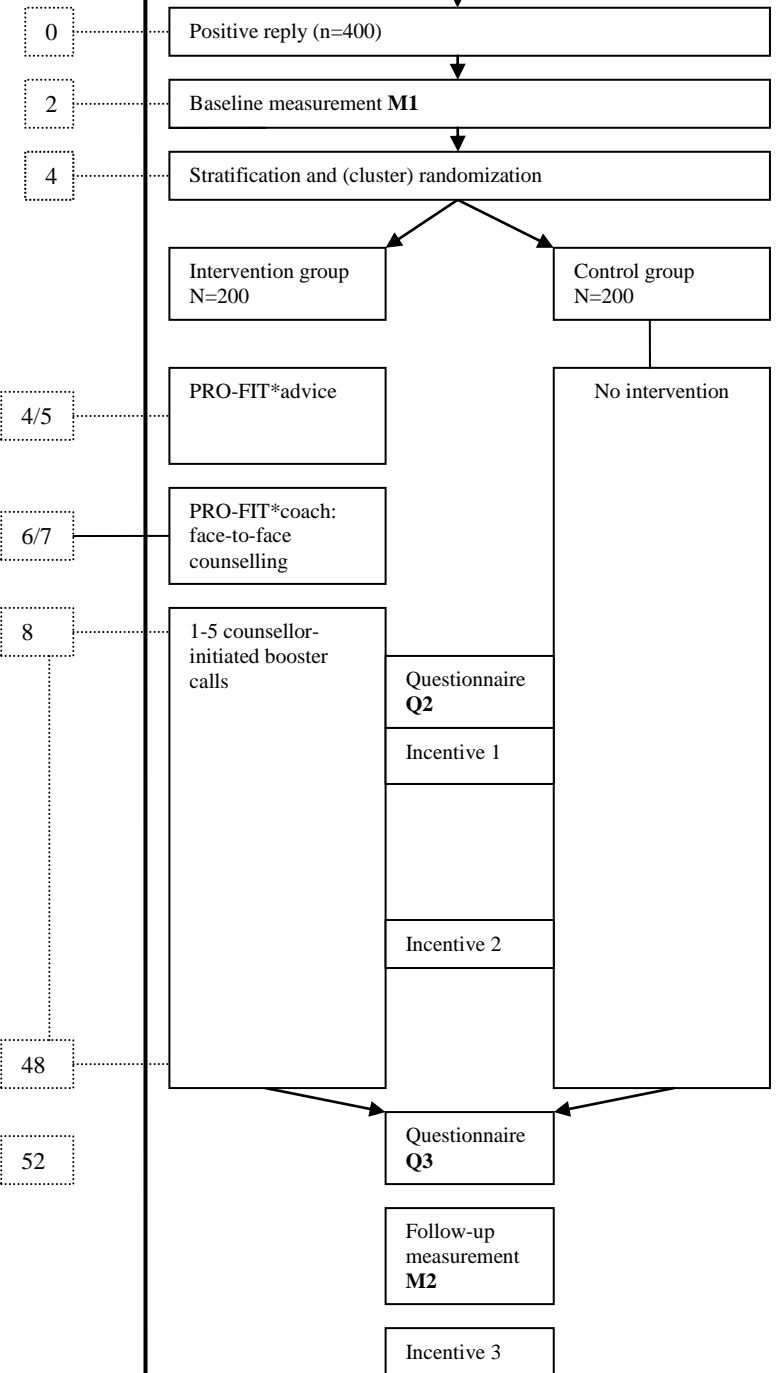

Supplement: MOESM2 [file 9486630]
